# Supplementary material for: Improved water oxidation with metal oxide catalysts via a regenerable and redox-inactive ZnOxHy overlayer
Source: Royal Society of Chemistry journal article supplement (doi:10.1039/d1cc03406e), 2021-01-01
Supplement: d1cc03406e1.pdf [file d1cc03406e1.pdf]

## Supporting Information

### Improved water oxidation with metal oxide catalysts via regenerable and redox-inactive $\text{ZnO}_x\text{H}_y$ overlayer

Swarnava Nandy <sup>a,b,c,†</sup>, Qianbao Wu <sup>c,†</sup>, S. David Tilley <sup>b,\*</sup> and Chunhua Cui <sup>a,c,\*</sup>

<sup>a</sup>Yangtze Delta Region Institute (Huzhou), University of Electronic Science and Technology of China, Huzhou, 313001, China

<sup>b</sup>Department of Chemistry, University of Zurich, Zurich, CH-8057, Switzerland.

<sup>c</sup>Molecular Electrochemistry Laboratory, Institute of Fundamental & Frontier Sciences, University of Electronic Science & Technology of China, Chengdu, 610054, China.

<sup>†</sup>Contributed equally to this work

### Table of Contents

|                                                                           |          |
|---------------------------------------------------------------------------|----------|
| <b>Experimental.....</b>                                                  | <b>2</b> |
| Fabrication of $\text{MO}_2/\text{ZnO}_x\text{H}_y$ (M= Co, Fe, Ni) films |          |
| Electrochemical measurements                                              |          |
| Physical characterization                                                 |          |
| <b>Supplementary Figures.....</b>                                         | <b>4</b> |

## Experimental:

### Fabrication of $\text{MO}_2/\text{ZnO}_x\text{H}_y$ (M= Co, Fe, Ni) :

Cobalt (II) chloride hexahydrate ( $\text{CoCl}_2 \cdot 6\text{H}_2\text{O}$ ) and iron (III) chloride hexahydrate ( $\text{FeCl}_3 \cdot 6\text{H}_2\text{O}$ ) were purchased from General reagent; Nickel (II) chloride hexahydrate  $\text{NiCl}_2 \cdot 6\text{H}_2\text{O}$  was purchased from Kelong; Zinc(II) nitrate hexahydrate [ $\text{Zn}(\text{NO}_3)_2 \cdot 6\text{H}_2\text{O}$ ], was purchased from Adamas.

Bare FTO was exposed to UV light for 10 min before deposition. Each of the respective metal chloride precursors was dissolved into water to form a 0.2-1.0 M aqueous solution. 1 mL metal precursor solution was spin-coated each time onto FTO at 500 rpm for 10 seconds thrice followed by at 3000 rpm once for one minute.<sup>1</sup> After spin-coating, the films were left under a non-coherent UV lamp for 12 h to decompose chloride ligands. After UV treatment, the  $\text{MO}_2$  films were annealed at a temperature with a range from 50-500 °C.

### Electrochemical measurements:

All electrochemical experiments were performed at room temperature (at 298 K) with a Bio-Logic SP-200 electrochemical workstation in a standard three-electrode system using FTO (F-doped  $\text{SnO}_2$ ) glass substrates as working electrode, a Pt wire as a counter electrode, and Ag/AgCl as a reference electrode. 1.0 M NaOH (pH 13.6 at 298 K) electrolyte solution was applied to measure OER performance of  $\text{MO}_2/\text{ZnO}_x\text{H}_y$  (M= Co and Fe) films. Whereas, 1.0 M Fe-free NaOH was prepared according to a reported procedure utilized as an electrolyte to measure OER performance of  $\text{NiO}_2/\text{ZnO}_x\text{H}_y$  films.<sup>2</sup> Polarization curves were obtained using cyclic voltammetry with a scan rate of 10 mV/s. The Tafel slope was drawn from polarization curves. All potentials reported in this manuscript were converted to a reversible hydrogen electrode (RHE) using  $E_{\text{RHE}} = E_{\text{Ag/AgCl}} + (0.197 + 0.059 \times \text{pH}) \text{ V}$ . The overpotentials were obtained using  $\eta = E_{\text{RHE}} - 1.23 \text{ V}$ . Electrochemical impedance spectroscopy (EIS) was measured at potential 1.60 V vs RHE with a frequency scan range from 100 kHz to 1 mHz, and the amplitude of the sinusoidal wave was 10 mV.

### Physical Characterizations:

The absorbance of the film was evaluated by QE Pro UV-visible spectrometer (Ocean Optics) equipped with an HL-2000 light source that connected via fiber-optic cables (200  $\mu\text{m}$  fiber core diameter). The baseline was subtracted in each specific experiment. Atomic Co/Zn ratio and valence state of constituting elements of different  $\text{CoO}_2/\text{ZnO}_x\text{H}_y$  films were confirmed by X-ray photoelectron spectroscopy on Escalab 250Xi and the binding energies were calibrated using the adventitious carbon by shifting the C1s peak to 284.8 eV. All XPS experiments were carried out by the Al K Alpha source gun and a constant spot size of 500  $\mu\text{m}$ . The morphology of the catalyst films was examined by scanning electron microscope (SEM) and elemental mapping on FEI Inspect F50. The structure was further analyzed by high-resolution TEM (HRTEM). The elements mapping and the lattice planes are characterized by selected area electron diffraction (SAED) (FEI TECNAL G2 F30) field emission

transmission electron microscope. The mass content of Co and Zn in  $\text{CoO}_z/\text{ZnO}_x\text{H}_y$  catalyst film were analyzed by Inductively Coupled Plasma Mass Spectroscopy (ICP-MS) (Optima 7000DV).

**Supplementary Figures:**

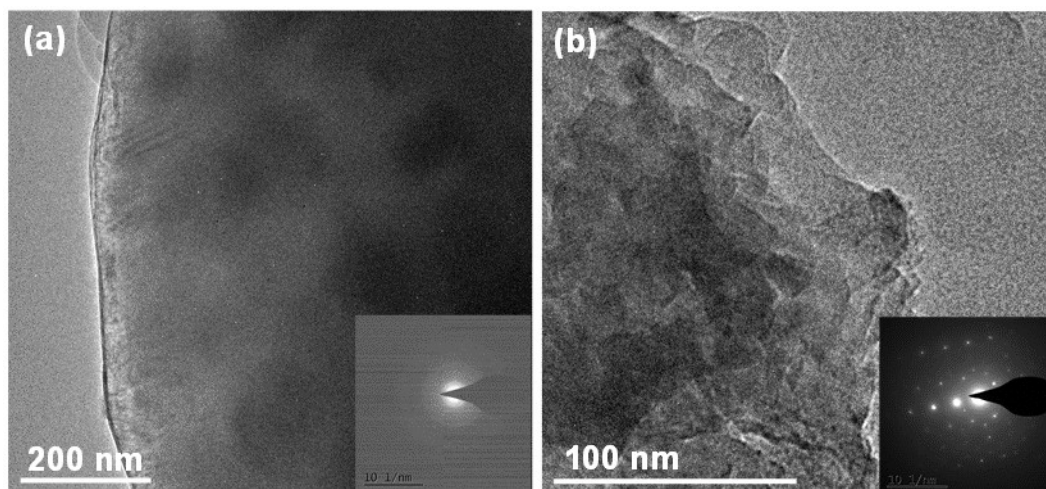

**Figure S1.** TEM and SAED patterns of CoO<sub>2</sub> films annealed at (a) 150 °C, (b) 500 °C prepared from aqueous 1.0 M CoCl<sub>2</sub>·6H<sub>2</sub>O precursor solution.

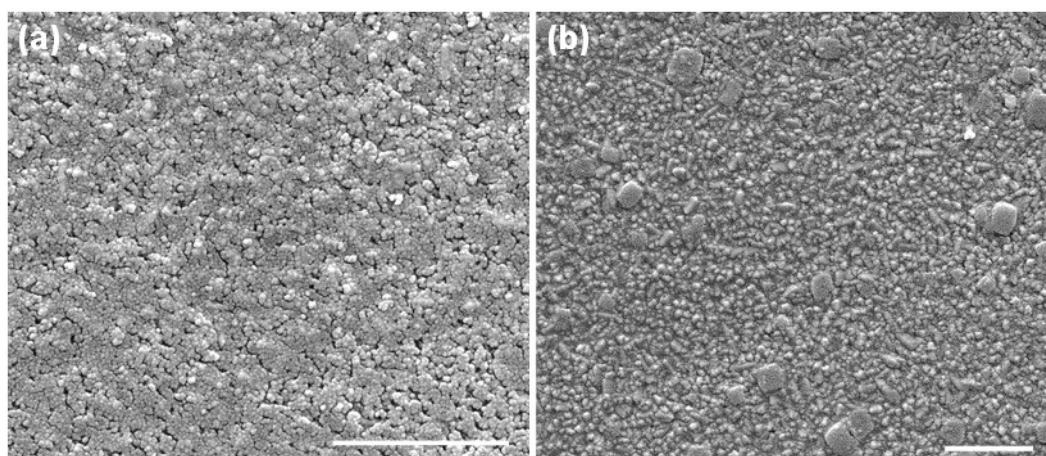

**Figure S2.** SEM images of CoO<sub>2</sub> films annealed at (a) 150 and (b) 500 °C, respectively, prepared from aqueous 1.0 M CoCl<sub>2</sub>·6H<sub>2</sub>O precursor solution. Scale bar represents 1.0 μm.

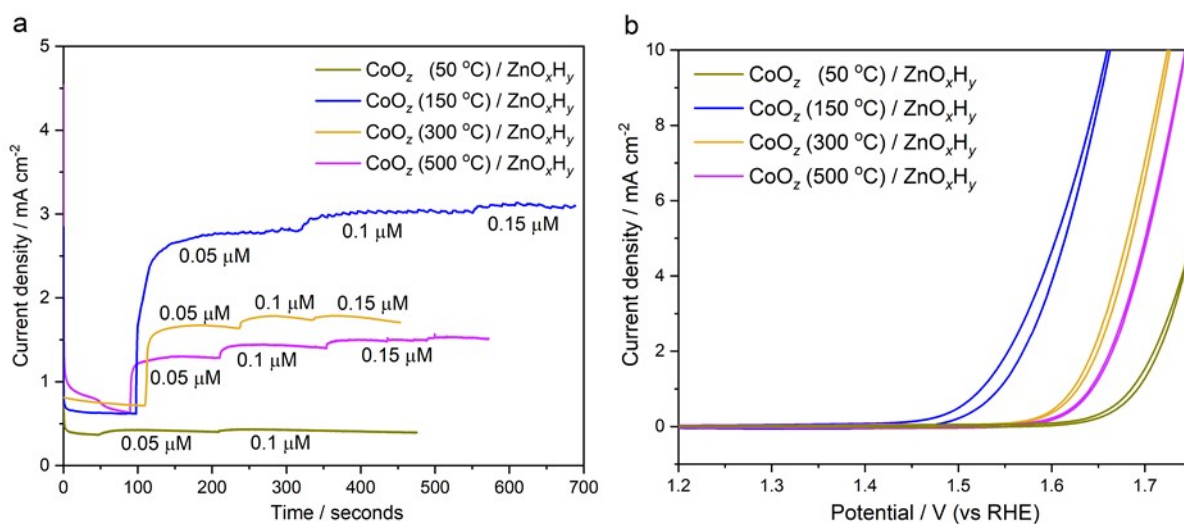

**Figure S3.** (a) CA with stepwise addition of Zn-anion solution measured at 1.6 V vs RHE and (b) CV curves of CoO<sub>2</sub>/ZnO<sub>x</sub>H<sub>y</sub> films where CoO<sub>2</sub> films onto FTO substrates were annealed at different temperatures. CoO<sub>2</sub> films were prepared from an aqueous 1.0 M CoCl<sub>2</sub>·6H<sub>2</sub>O precursor solution.

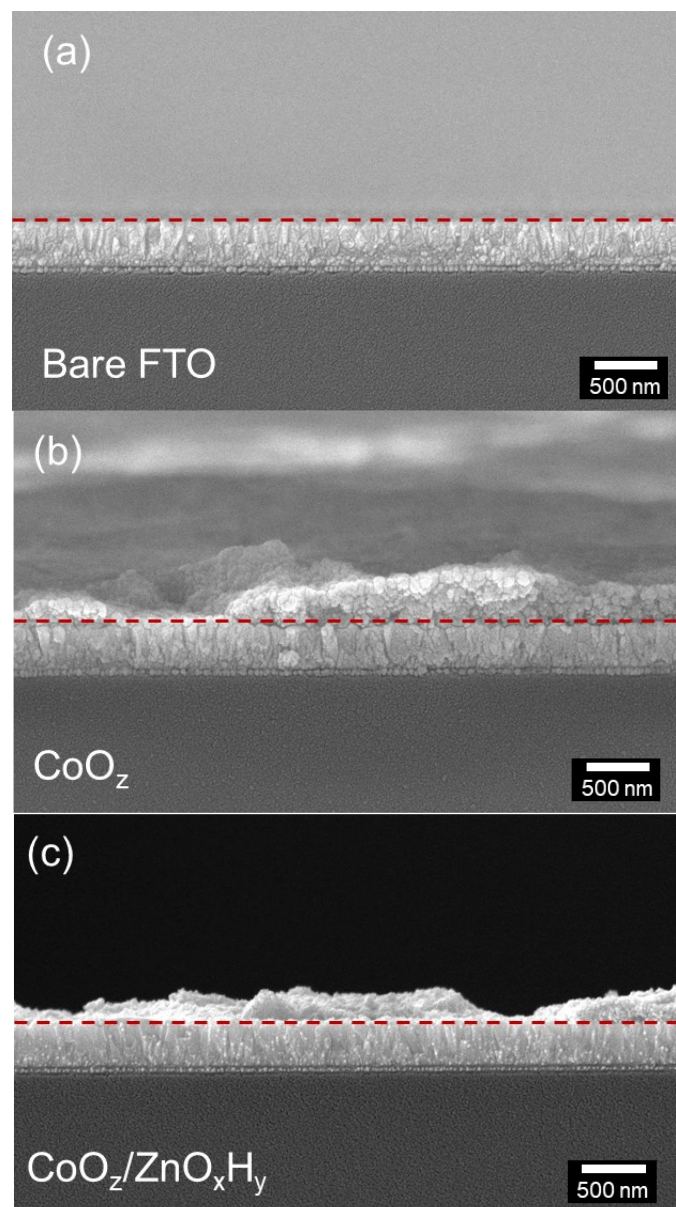

**Figure S4.** Cross-sectional SEM images of bare FTO,  $\text{CoO}_z$ , and  $\text{CoO}_z/\text{ZnO}_y\text{H}_z$  films.

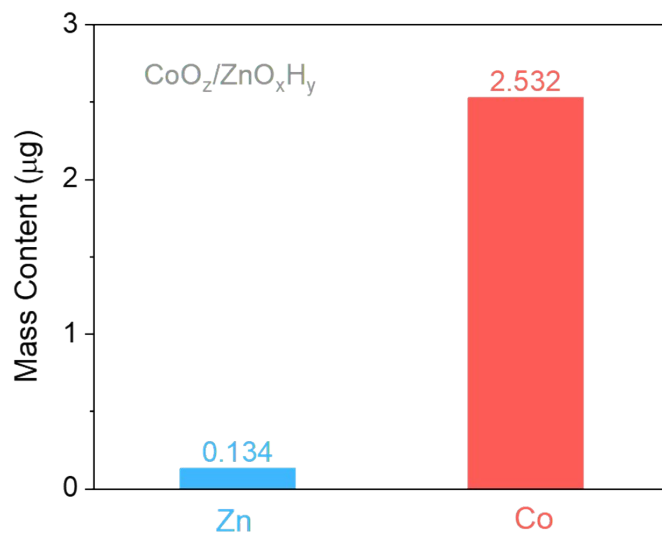

**Figure S5.** The Co and Zn content in CoO<sub>z</sub>/ZnO<sub>x</sub>H<sub>y</sub> film was analyzed by Inductively Coupled Plasma Mass Spectroscopy (ICP-MS) (Optima 7000DV). The as-prepared CoO<sub>z</sub>/ZnO<sub>x</sub>H<sub>y</sub> catalyst film was put into HNO<sub>3</sub> for 24 hours to ensure complete dissolution which was further diluted to perform the analysis.

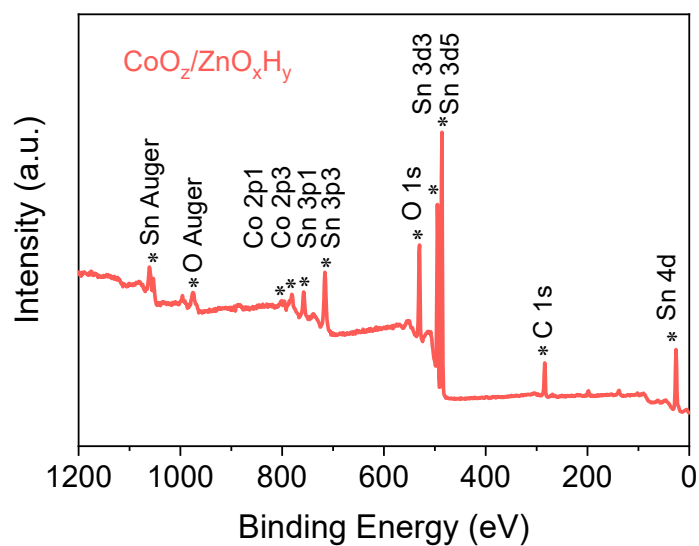

**Figure S6.** The XPS spectra of CoO<sub>z</sub>/ZnO<sub>y</sub>H<sub>z</sub> films.

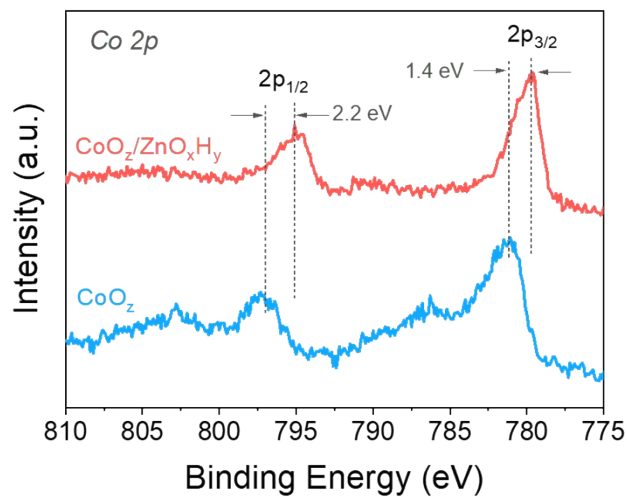

**Figure S7.** Co 2p XPS spectra of bare  $\text{CoO}_z$  and  $\text{CoO}_z/\text{ZnO}_x\text{H}_y$ .

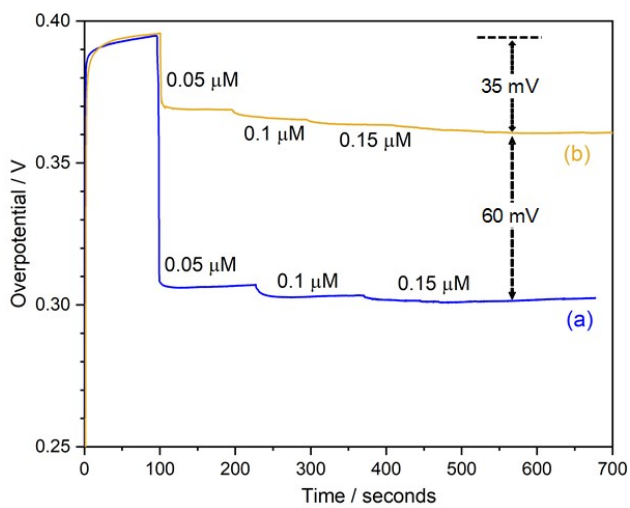

**Figure S8.** Chronopotentiometric (CP) curves of  $\text{CoO}_z$  films annealed at (a) 150 °C, and (b) 300 °C, respectively, with stepwise addition of  $[\text{Zn}(\text{OH})_4]^{2-}$  solution operating at 1.0  $\text{mA}/\text{cm}^2$ .



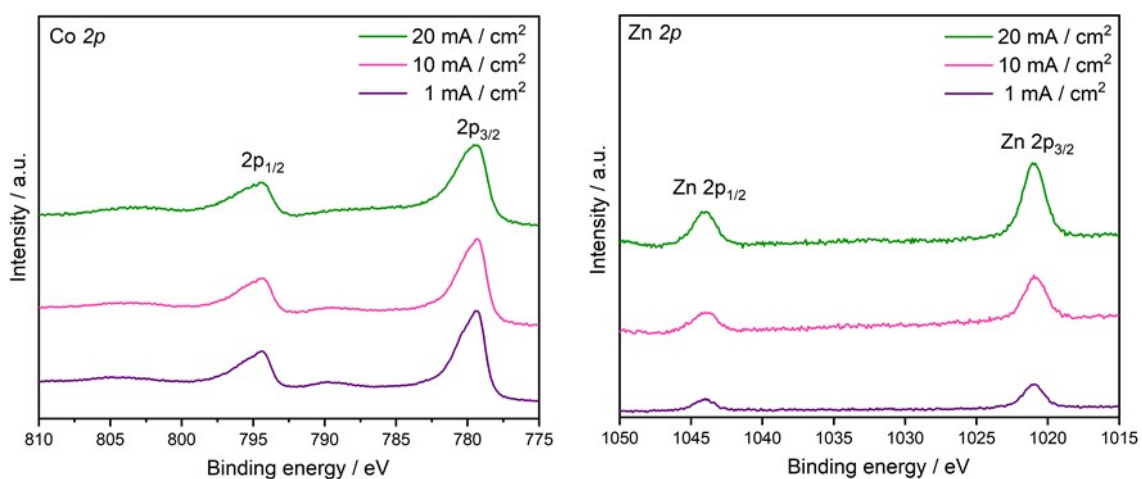

**Figure S9.** XPS spectra of  $\text{CoO}_2/\text{ZnO}_x\text{H}_y$  films while using different current densities to deposit  $\text{ZnO}_x\text{H}_y$  onto  $\text{CoO}_2$  surface.

**Table S1.** Atomic Co/Zn ratio of  $\text{CoO}_2/\text{ZnO}_x\text{H}_y$  films while using different current densities to deposit  $\text{ZnO}_x\text{H}_y$  layer onto  $\text{CoO}_2$  surface.

| Current density ( $\text{mA cm}^{-2}$ ) | Surface Co/Zn ratio |
|-----------------------------------------|---------------------|
| 1.0                                     | 21.24               |
| 10.0                                    | 12.29               |
| 20.0                                    | 10.69               |

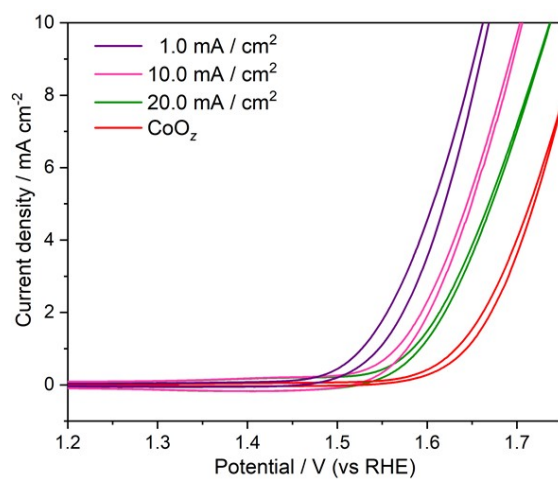

**Figure S10.** CV curves of CoO<sub>2</sub>/ZnO<sub>x</sub>H<sub>y</sub> films while using different current densities to deposit ZnO<sub>x</sub>H<sub>y</sub> layer onto CoO<sub>2</sub> surface.

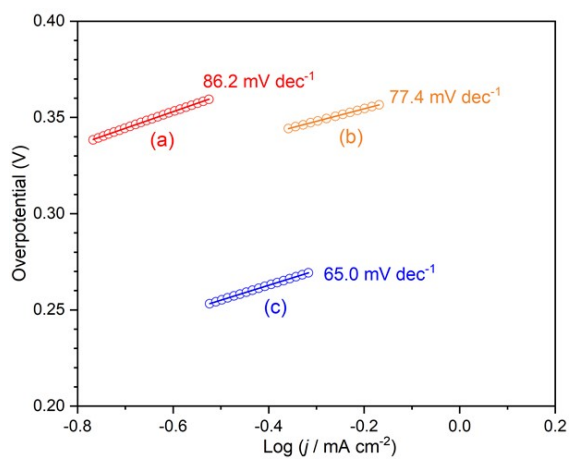

**Figure S11.** Tafel slopes of (a) CoO<sub>2</sub>, (b) CoZnO<sub>x</sub>H<sub>y</sub>, and (c) CoO<sub>2</sub>/ZnO<sub>x</sub>H<sub>y</sub> films.

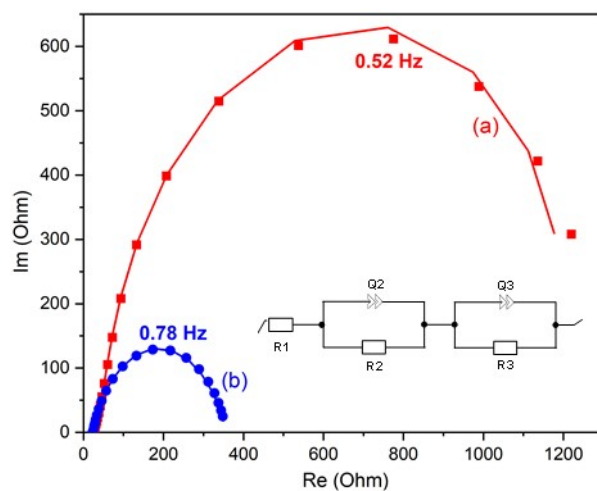

**Figure S12.** Charge transfer of (a) CoO<sub>2</sub>, and (b) CoO<sub>2</sub>/ZnO<sub>x</sub>H<sub>y</sub> films. Inset shows the electrical equivalent circuit.

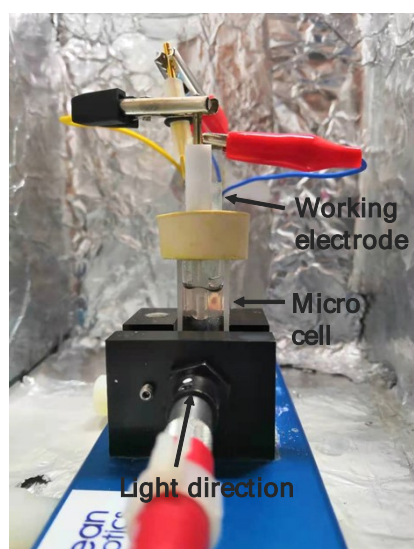

**Figure S13.** Photograph of home-made cell for in-situ spectroelectrochemical UV-vis setup.

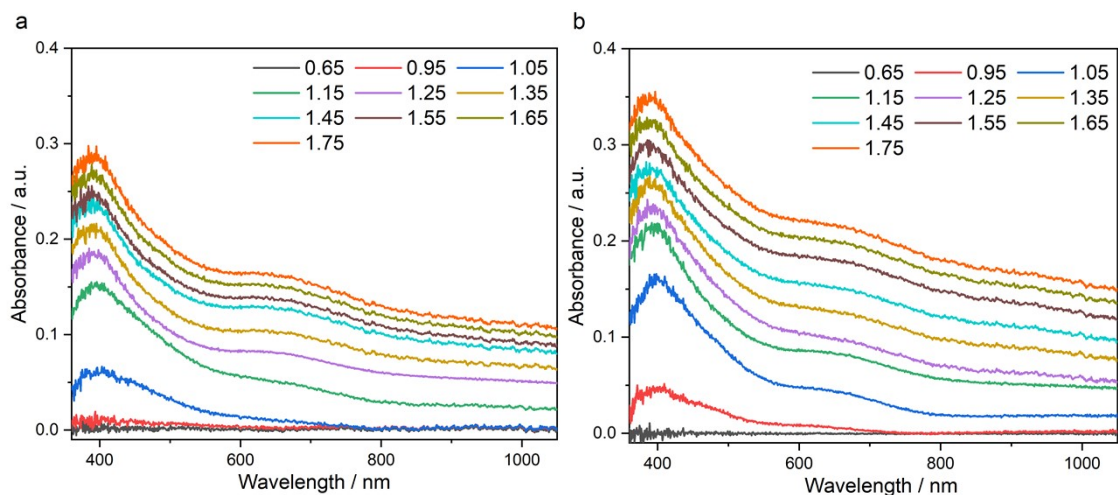

**Figure S14.** In-situ UV-vis absorbance of (A)  $\text{CoO}_2$ , and (B)  $\text{CoO}_2/\text{ZnO}_x\text{H}_y$  films at different potentials measured during OER.

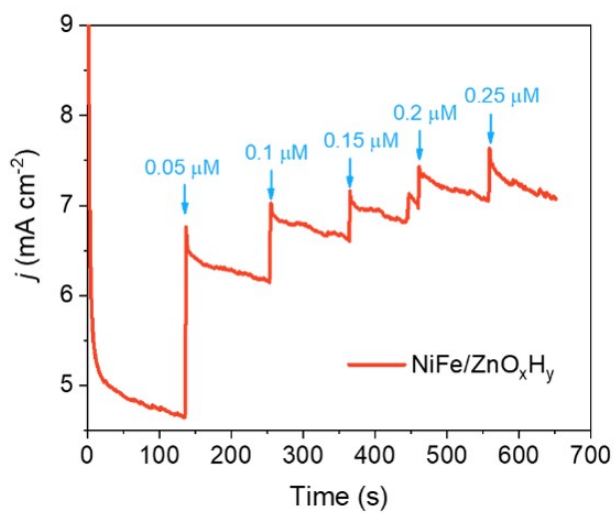

**Figure S15.** CA curve was recorded at 1.6 V vs RHE upon addition of Zn-anion on NiFeOOH catalyst. The NiFeOOH catalyst film was synthesized by hydrothermal method according to previously reported work.<sup>3</sup>

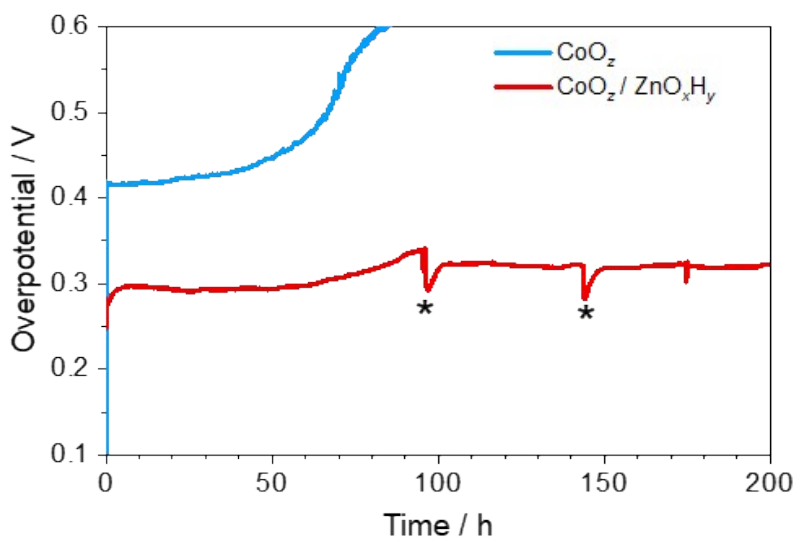

**Figure S16.** Long-term stability measurement of the bare  $\text{CoO}_2$  and  $\text{CoO}_2/\text{ZnO}_x\text{H}_y$  films operating at  $1.0 \text{ mA/cm}^2$ . Asterisks (\*) on the curve for the  $\text{CoO}_2/\text{ZnO}_x\text{H}_y$  indicate an extra addition of  $0.1 \mu\text{M} [\text{Zn}(\text{OH})_4]^{2-}$  into the electrolyte.

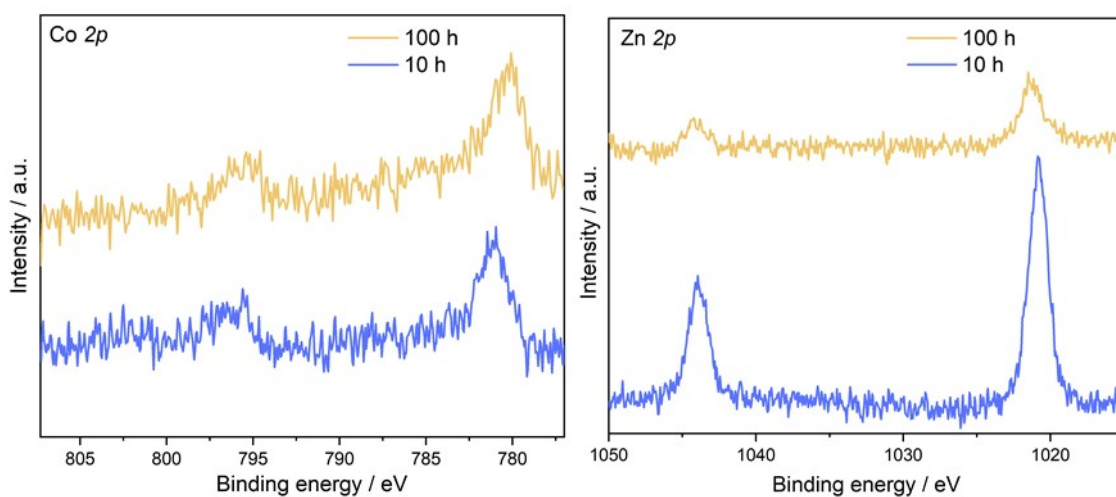

**Figure S17.** XPS spectra of  $\text{CoO}_2/\text{ZnO}_x\text{H}_y$  films during stability experiment after 10 h and 100 h.

## References

1. J. He, D. M. Weekes, W. Cheng, K. E. Dettelbach, A. Huang, T. Li and C. P. Berlinguette, Photodecomposition of Metal Nitrate and Chloride Compounds Yields Amorphous Metal Oxide Films. *J. Am. Chem. Soc.* 2017, **139**, 18174-18177.
2. L. Trotochaud, S. L. Young, J. K. Ranney and S. W. Boettcher, Nickel-iron oxyhydroxide oxygen-evolution electrocatalysts: the role of intentional and incidental iron incorporation. *J. Am. Chem. Soc.* 2014, **136**, 6744-6753.
3. Z. Lu, W. Xu, W. Zhu, Q. Yang, X. Lei, J. Liu, Y. Li, X. Sun and X. Duan, *Chem. Commun.*, 2014, **50**, 6479-6482.
